# Supplementary material for: Divergent Paths for Adult Mortality in Russia and Central Asia: Evidence from Kyrgyzstan
Source: PubMed Central journal article supplement (PMC3792976; doi:10.1371/journal.pone.0075314), 2013-10-08
Supplement: pone.0075314.s001.pdf [file pone.0075314.s001.pdf]

Table S1 : Codes Used for the Calculation of Cause-Specific Mortality in Kyrgyzstan

| Cause of death                     | 1981-1984                                                                                | 1985-1988                                                                                | 1989-1995  | 1996                    | 1997-1998               | 1999                                                                                          | 2000-10                                                                                                                                  |
|------------------------------------|------------------------------------------------------------------------------------------|------------------------------------------------------------------------------------------|------------|-------------------------|-------------------------|-----------------------------------------------------------------------------------------------|------------------------------------------------------------------------------------------------------------------------------------------|
| All Causes                         | 1-185                                                                                    | 1-175                                                                                    | 1-175, 206 | 1-97, 100-175, 196-206  | 1-97, 100-175, 196-208  | 1-97, 100-175, 196-209                                                                        | A00-G99, H60-H95, I00-R00, V01-Y98 (Classes 1-18, 20)                                                                                    |
| Infectious and Parasitic Diseases  | 1-44                                                                                     |                                                                                          | 1-44, 206  |                         |                         |                                                                                               | A00-B99 (Class 1)                                                                                                                        |
| Neoplasms                          | 45-67                                                                                    |                                                                                          |            |                         |                         |                                                                                               | C00-D48 (Class 2)                                                                                                                        |
| Diseases of the Circulatory System | 84-102                                                                                   |                                                                                          |            | 84-97, 100-102, 196-205 |                         |                                                                                               | I00-I99 (Class 9)                                                                                                                        |
| Diseases of the Respiratory System | 103-114                                                                                  |                                                                                          |            |                         |                         |                                                                                               | J00-J99 (Class 10)                                                                                                                       |
| Diseases of the Digestive System   | 115-127                                                                                  |                                                                                          |            |                         |                         |                                                                                               | K00-K93 (Class 11)                                                                                                                       |
| External Causes                    | 160-185                                                                                  | 160-175                                                                                  |            |                         |                         | 160-175, 209                                                                                  | V01-Y98 (Class 20)                                                                                                                       |
| Other Causes                       | 68-83, 128-159                                                                           |                                                                                          |            |                         | 68-83, 128-159, 207-208 |                                                                                               | D50-D89, E00-E90, F00-F99, G00-G99, H00-H59, H60-H95, L00-L99, M00-M99, N00-N99, O00-O99, P00-P96, Q00-Q99, R00-R99 (Classes 3-8, 12-18) |
| Strongly alcohol-related causes    | 45-46, 52; 9-13, 43; 103-107, 110-114; 30, 122-123; 126; 92-97; 158-159; 73, 75, 160-185 | 45-46, 52; 9-13, 43; 103-107, 110-114; 30, 122-123; 126; 92-97; 158-159; 73, 75, 160-175 |            |                         |                         | 45-46, 52; 9-13, 43; 103-107, 110-114; 30, 122-123; 126; 92-97; 158-159; 73, 75, 160-175, 209 | A15-A19, B15-B19, B90, C00-C15, C32, F10, I20, I24-I28, I30-I52, J00-J18, J30-J39, J47, J60-J99, K70, K74, K85-K86, R00-R99, V01-Y99     |

Note: The list of strongly alcohol-related causes for the period 2000-2010 slightly differs from Zaridze's list of ICD-10 codes, in order to improve comparability with the earlier Soviet classification.
