# Supplementary material for: Divergent Paths for Adult Mortality in Russia and Central Asia: Evidence from Kyrgyzstan
Source: PubMed Central journal article supplement (PMC3792976; doi:10.1371/journal.pone.0075314), 2013-10-08
Supplement: pone.0075314.s002.pdf [file pone.0075314.s002.pdf]

Table S2: Codes Used for the Calculation of Cause-Specific Mortality in Russia

| <b>Cause of death</b>              | <b>1981-1987</b>                                                                         | <b>1988-1998</b>                                                                         | <b>1999-2010</b>                                                                               |
|------------------------------------|------------------------------------------------------------------------------------------|------------------------------------------------------------------------------------------|------------------------------------------------------------------------------------------------|
| All Causes                         | 1-159, 186-195                                                                           | 1-159, 186-195, 206                                                                      | 1-238                                                                                          |
| Infectious and Parasitic Diseases  | 1-44                                                                                     | 1-44,206                                                                                 | 1-55                                                                                           |
| Neoplasms                          | 45-67                                                                                    | 45-67                                                                                    | 56-89                                                                                          |
| Diseases of the Circulatory System | 84-102                                                                                   | 84-102                                                                                   | 115-147                                                                                        |
| Diseases of the Respiratory System | 103-114                                                                                  | 103-114                                                                                  | 148-164                                                                                        |
| Diseases of the Digestive System   | 115-127                                                                                  | 115-127                                                                                  | 165-179                                                                                        |
| External Causes                    | 186-195                                                                                  | 186-195                                                                                  | 229-238                                                                                        |
| Other Causes                       | 68-83, 128-159                                                                           | 68-83, 128-159                                                                           | 90-114, 180-228                                                                                |
| Strongly alcohol-related causes    | 45-46, 52; 9-13, 43; 103-107, 110-114; 30, 122-123; 126; 92-97; 158-159; 73, 75, 186-195 | 45-46, 52; 9-13, 43; 103-107, 110-114; 30, 122-123; 126; 92-97; 158-159; 73, 75, 186-195 | 56-57,65; 9-15, 54; 148, 150-155,160-164; 41-43,173-174; 178; 125-132; 226-228; 97-98, 229-238 |

Note: The list of strongly alcohol-related causes for the period 1999-2010 slightly differs from Zaridze's list, in order to improve comparability with the earlier Soviet classification.
